# Supplementary material for: Teletherapy and hospitalizations in patients with serious mental illness during the COVID-19 pandemic: A retrospective multicenter study
Source: PubMed Central journal article supplement (PMC9015154; doi:10.1371/journal.pone.0267209), 2022-04-18

# PROPORTION COMPARISON

(difference between two proportions)

|                                        | Test type    |
|----------------------------------------|--------------|
| Test type (1.unilateral o 2.bilateral) | 1 UNILATERAL |
| Confidence level (1- $\alpha$ )        | 95%          |
| Power                                  | 80%          |
| P <sub>1</sub> Proportion sample A     | 20%          |
| P <sub>2</sub> Proportion sample B     | 30%          |
| <b>SAMPLE SIZE (n)</b>                 | <b>231</b>   |

## SAMPLE SIZE ADJUSTED TO LOSS

|                                |            |
|--------------------------------|------------|
| Expected loss proportion ( R ) | 15%        |
| <b>Sample adjusted to loss</b> | <b>272</b> |

*Beatriz López Calviño  
Salvador Pita Fernández  
Sonia Pértega Díaz  
Teresa Seoane Pillado  
Unidad de epidemiología clínica y bioestadística  
Complejo Hospitalario Universitario A Coruña*

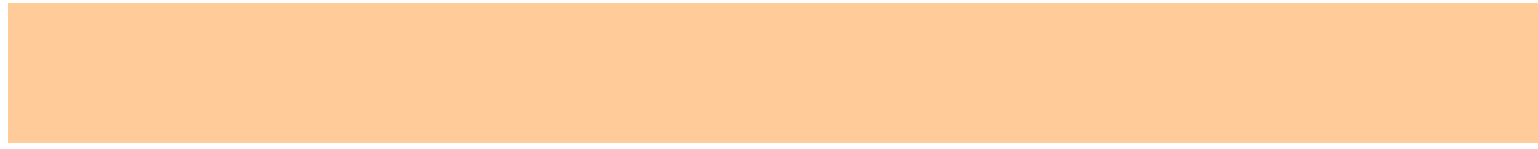

Supplement: pone.0267209.s001.pdf [file pone.0267209.s001.pdf]
